# Supplementary material for: A brain-plausible neuromorphic on-the-fly learning system implemented with magnetic domain wall analog memristors
Source: PubMed Central journal article supplement — Sci Adv. 2019 Apr 26;5(4):eaau8170. doi: 10.1126/sciadv.aau8170 (PMC6486231; doi:10.1126/sciadv.aau8170), 2019-04-26
Supplement: aau8170_SM.pdf [file aau8170_SM.pdf]

## Supplementary Materials for

### **A brain-plausible neuromorphic on-the-fly learning system implemented with magnetic domain wall analog memristors**

Kun Yue, Yizhou Liu, Roger K. Lake\*, Alice C. Parker\*

\*Corresponding author. Email: rlake@ece.ucr.edu (R.K.L.); parker@usc.edu (A.C.P.)

Published 26 April 2019, *Sci. Adv.* **5**, eaau8170 (2019)  
DOI: 10.1126/sciadv.aau8170

#### **This PDF file includes:**

Fig. S1. Simulation results of the successive pattern recognitions.

## **Supplementary Material**

A simulation of three successive pattern recognitions by the feed-forward neuronal network is presented in the supplementary material. The three patterns shown in fig. S1 (a) are fed into the same feed-forward neuronal network described in the main text (25 input neurons, 500 synapses, and 20 output neurons) at 0 ns, 65ns, and 130 ns. Each pixel of the pattern is encoded as 8 spikes with 6 ns interval. The learning result is shown in fig. S1 (b). The neuron 9, 16, and 17 learned the first pattern; the neuron 13 and 15 learned the second pattern; the neuron 7 and 12 learned the third pattern.

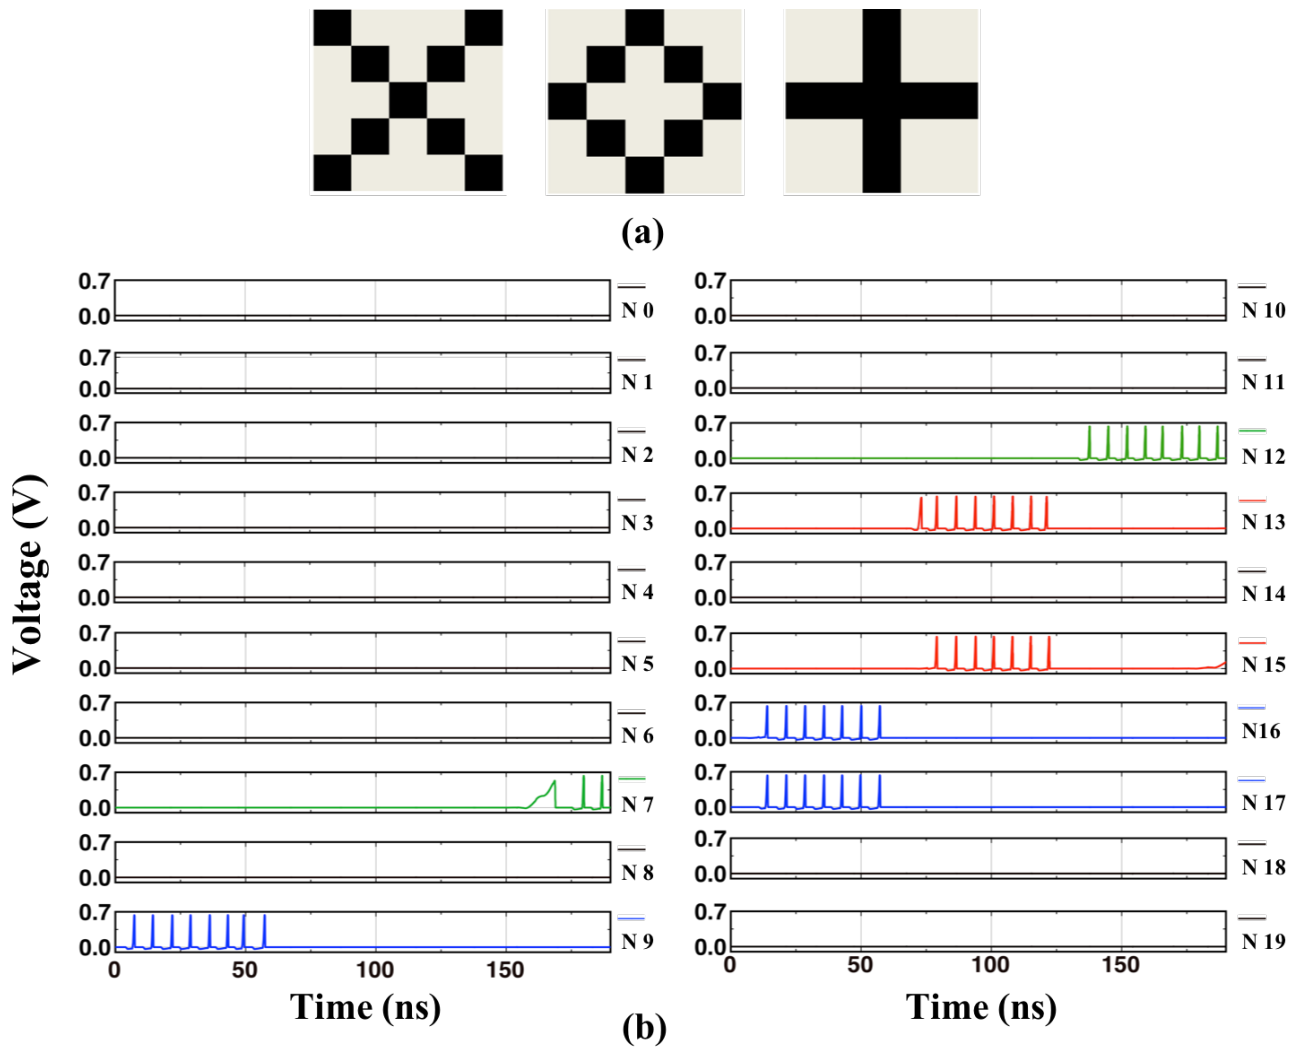

**Fig. S1. Simulations results of the successive pattern recognitions.** (a) The three patterns fed into the feed-forward neuronal network. (b) The 20 output neurons response during the on-the-fly learning process of the three successive patterns.
